# Supplementary material for: Inferring extrinsic noise from single-cell gene expression data using approximate Bayesian computation
Source: PubMed Central journal article supplement (PMC4994381; doi:10.1186/s12918-016-0324-x), 2016-08-22
Supplement: 12918_2016_324_MOESM1_ESM.pdf [file 12918_2016_324_MOESM1_ESM.pdf]

# DERIVATION OF THE POISSONIAN RELATIONSHIP BETWEEN THE NUMBER OF SURVIVING PROTEIN MOLECULES AND MRNA LIFETIME

OLEG LENIVE, PAUL D.W. KIRK, & MICHAEL P.H. STUMPF

## DERIVATION OF THE POISSONIAN RELATIONSHIP BETWEEN THE NUMBER OF SURVIVING PROTEIN MOLECULES AND mRNA LIFETIME

### 1. DERIVATIONS

Consider the following system of reactions.

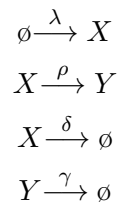

The system is allowed to run, starting with zero tokens of  $X$  and  $Y$ , from time  $t_0$  until time  $t_m$ . The following table lists events of interest which can occur in the system and the symbols used to represent the number of times each even occurs in the time interval  $T = t_m - t_0$ .

| Symbol    | Event being counted                                                               |
|-----------|-----------------------------------------------------------------------------------|
| $i$       | $X$ is produced                                                                   |
| $j$       | $X$ survived until time $t_m$                                                     |
| $\hat{i}$ | $X$ does not survive until time $t_m$ (i.e. $X$ is degraded or converted to $Y$ ) |
| $\hat{j}$ | $X$ is degraded                                                                   |
| $k$       | $X$ is converted into $Y$                                                         |
| $l$       | $Y$ survives until time $t_m$                                                     |

**1.1. Deriving probability distributions for the numbers of events.** A standard result is that the number of events which occur over a time period will have a Poisson distribution if the events are occurring with a uniform probability in a time interval. This applies to the production of  $X$ .

$$(1) \quad P(i) = \frac{(\lambda T)^i}{i!} e^{-\lambda T}$$

Where  $P(i)$  is the probability that  $X$  is produced  $i$  times during the time period  $T$ .

**1.2. Finding the number of surviving tokens of  $X$ .** In order to find the probability distribution of the number of  $X$  tokens after the time period  $T$  we consider the probability that  $j$  tokens of  $X$  remain given that  $i$  tokens of  $X$  were produced.

$$(2) \quad P(j|i) = \binom{i}{j} p^j (1-p)^{i-j}$$

Where  $p$  is the probability that  $X$  survives given that it was produced during the time period  $T$ .

Let  $P(j)$  be the probability that  $j$  tokens of  $X$  were produced during  $T$  and survived regardless of the number ( $i$ ) of  $X$  tokens produced.

$$(3) \quad P(j) = \sum_{i=j}^{\infty} P(i)P(j|i)$$

Using equations 1 and 2.

$$\begin{aligned} P(j) &= \sum_{i=j}^{\infty} \frac{(\lambda T)^i}{i!} e^{-\lambda T} \binom{i}{j} p^j (1-p)^{i-j} \\ &= e^{-\lambda T} p^j \sum_{i=j}^{\infty} \frac{(\lambda T)^i}{i!} \frac{i!}{j!(i-j)!} p^j (1-p)^{i-j} \\ &= \frac{e^{-\lambda T} p^j}{j!(1-p)^j} \sum_{i=j}^{\infty} \frac{q^i}{(i-j)!} \end{aligned}$$

Where  $q = \lambda T(1-p)$ .

Considering just the summation term.

$$\begin{aligned} \sum_{i=j}^{\infty} \frac{q^i}{(i-j)!} &= \frac{q^j}{0!} + \frac{q^{j+1}}{1!} + \frac{q^{j+2}}{2!} + \frac{q^{j+2}}{2!} + \dots + \frac{q^{j+i}}{(i-j)!} + \dots \\ &= q^j \left( 1 + \frac{q}{1} + \frac{q^2}{2!} + \frac{q^3}{3!} + \dots + \frac{q^i}{(i-j)!} + \dots \right) \\ &= q^j \sum_{n=0}^{\infty} \frac{q^n}{n!} = q^j e^q \\ &= (\lambda T)^j (1-p)^j e^{\lambda T(1-p)} \end{aligned}$$

Thus, the expression for  $P(j)$  can be written as:

$$P(j) = \frac{e^{-r} p^j (\lambda T)^j (1-p)^j e^{\lambda T(1-p)}}{j! (1-p)^j}$$

$$(4) \quad P(j) = \frac{(p\lambda T)^j}{j!} e^{-p\lambda T}$$

$P(j)$  has a Poisson distribution with the parameter  $p\lambda T$ .

Next, we need to find  $p$ . The probability that  $X$  was produced during a infinitesimally short time interval  $dt$  is given by  $dt/T$ . That is to say that  $X$  is produced once at some point during  $T$  and the probability of  $X$  production is uniform over  $T$ . The probability of a token of  $X$  produced at time  $t$  surviving until time  $t_m$  follows an exponential decay with a rate  $\delta'$ . In this case  $\delta' = \rho + \delta$ . Thus the probability of a token of  $X$  being produced at time  $t$  and surviving until  $t_m$  is given by

$$\frac{dt}{T} e^{-\delta'(t_m-t)}$$

The overall probability that  $X$  survives given that it was produced can be found by integrating over the time period  $T$ .

$$p = \int_{t_0}^{t_m} \frac{dt}{T} e^{-\delta'(t_m-t)}$$

$$(5) \quad p = \frac{1}{\delta'T} \left(1 - e^{-\delta'T}\right)$$

Where  $T = t_m - t_0$ .

The numbers of the other events are also Poisson distributed. Similarly to  $P(j)$ , the number of tokens of  $X$  which did not survive ( $P(\hat{i})$ ) will also be Poisson distributed.

$$P(\hat{i}) = \frac{p_i \lambda T}{\hat{i}!} e^{-p_i \lambda T}$$

Where  $p_i = (1-p) = 1 - \frac{1}{\delta'T} (1 - e^{\delta'T})$ .

Also, for  $P(k)$ , the distribution of the number of tokens of  $Y$  produced

$$P(k) = \frac{(p_k \lambda T)^k}{k!} e^{-p_k \lambda T}$$

with  $p_k = \frac{\rho}{\rho+\delta} (1-p)$ .
